# Supplementary material for: TLR7 promotes chronic airway disease in RSV-infected mice
Source: PubMed Central journal article supplement (PMC10545951; doi:10.3389/fimmu.2023.1240552), 2023-09-14
Supplement: DataSheet_1.pdf [file DataSheet_1.pdf]

## *Supplementary Material*

### **TLR7 promotes chronic airway disease in RSV-infected mice**

**Mark A. Miles<sup>1</sup>, Stella Liong<sup>1</sup>, Felicia Liong<sup>1</sup>, Madison Coward-Smith<sup>1</sup>, Gemma S. Trollope<sup>1</sup>, Osezua Oseghale<sup>1</sup>, Jonathan R. Erlich<sup>1</sup>, Robert D. Brooks<sup>2</sup>, Jessica M. Logan<sup>2</sup>, Shane Hickey<sup>2</sup>, Hao Wang<sup>1</sup>, Steven Bozinovski<sup>1</sup>, John J. O’Leary<sup>3,4,5</sup>, Doug A. Brooks<sup>2,3</sup> and Stavros Selemidis<sup>1\*</sup>**

<sup>1</sup> Centre for Respiratory Science and Health, School of Health and Biomedical Sciences, RMIT University, Bundoora, Victoria, 3083, Australia.

<sup>2</sup> Clinical and Health Sciences, University of South Australia, Adelaide, 5001, Australia.

<sup>3</sup> Discipline of Histopathology, School of Medicine, Trinity Translational Medicine Institute (TTMI), Trinity College Dublin, Ireland.

<sup>4</sup> Sir Patrick Dun’s Laboratory, Central Pathology Laboratory, St James’s Hospital, Dublin, Ireland.

<sup>5</sup> CERVIVA research consortium, Trinity College Dublin, Ireland.

**\* Correspondence:**

Stavros Selemidis

[stavros.selemidis@rmit.edu.au](mailto:stavros.selemidis@rmit.edu.au)

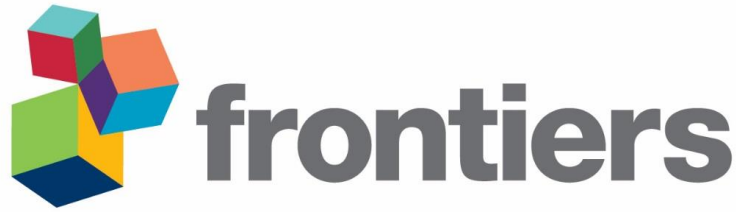

**A**

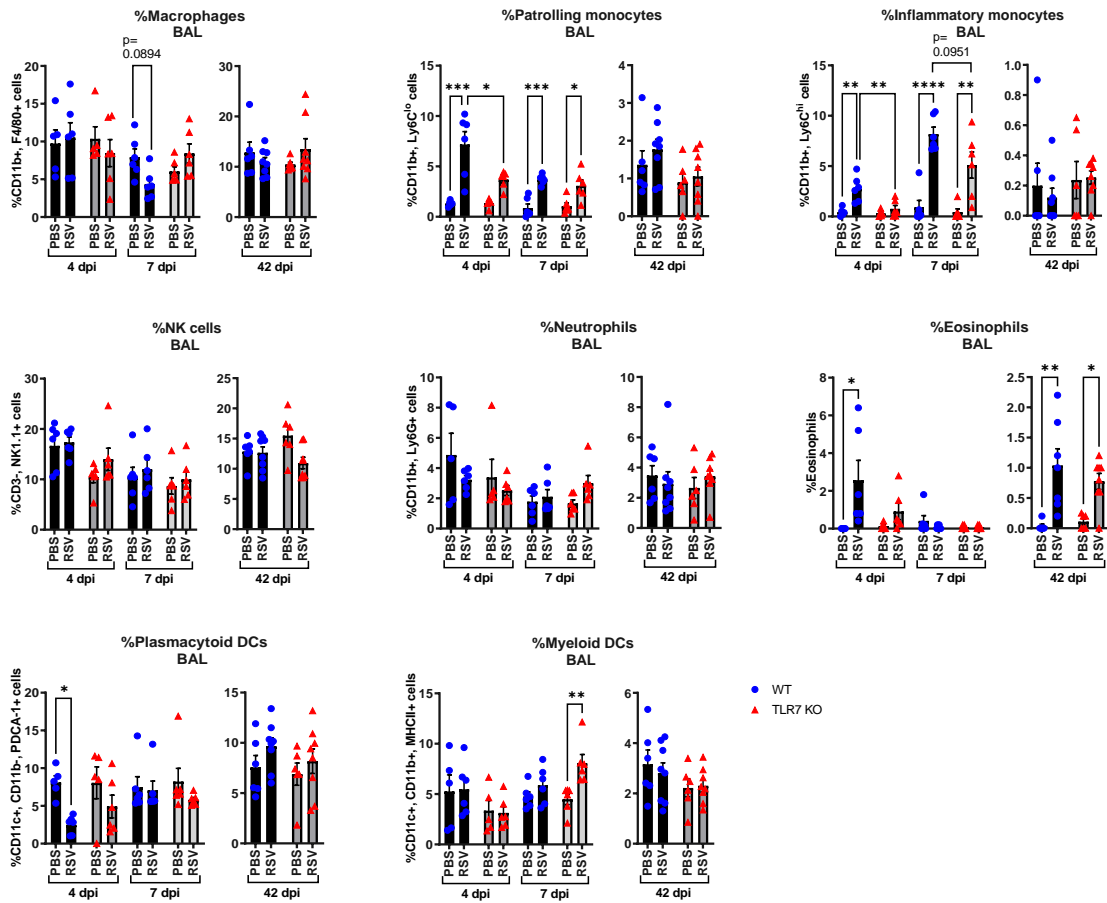

**B**

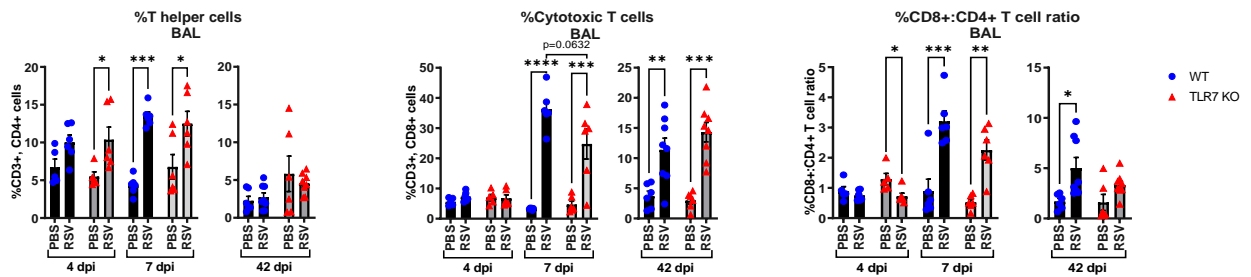

**Supplementary Figure S1. Airway immune composition is not dramatically altered in TLR7 KO mice following RSV infection.** WT C57BL/6 or TLR7 KO mice were infected with RSV ( $0.5-2 \times 10^7$  PFUs) or PBS via intranasal administration and analysis performed after 4, 7 or 42 dpi. The percentage of immune cell populations in the airways collected in the BAL fluid was determined by flow cytometry. (A) Innate immune cell types: interstitial macrophages ( $CD11b^+ F4/80^+$ ), patrolling monocytes ( $CD11b^+ Ly6C^{lo}$ ), inflammatory monocytes ( $CD11b^+ Ly6C^{hi}$ ), NK cells ( $CD3^- NK1.1^+$ ), neutrophils ( $CD11b^+ Ly6G^+$ ), plasmacytoid DCs ( $CD11c^+ CD11b^- PDCA-1^+$ ) and myeloid DCs ( $CD11c^+ CD11b^+ MHCII^+$ ). Numbers of differentially stained eosinophils was determined by counting 500 cells from random fields by standard morphological criteria relative to the total number of isolated cells. (B) Adaptive T cell subtypes: T helper ( $CD3^+ CD4^+$ ) and cytotoxic T cells ( $CD3^+ CD8^+$ ). Cell populations were measured as percentage of  $CD45^+$  cells. Data are expressed as mean  $\pm$  SEM, n = 5-8 mice per experimental group from two independent experiments. Statistical analysis was conducted using two-way ANOVA test followed by Tukey's post hoc test for multiple comparison test (\*p < 0.05, \*\*p < 0.01, \*\*\*p < 0.001, \*\*\*\*p < 0.0001).

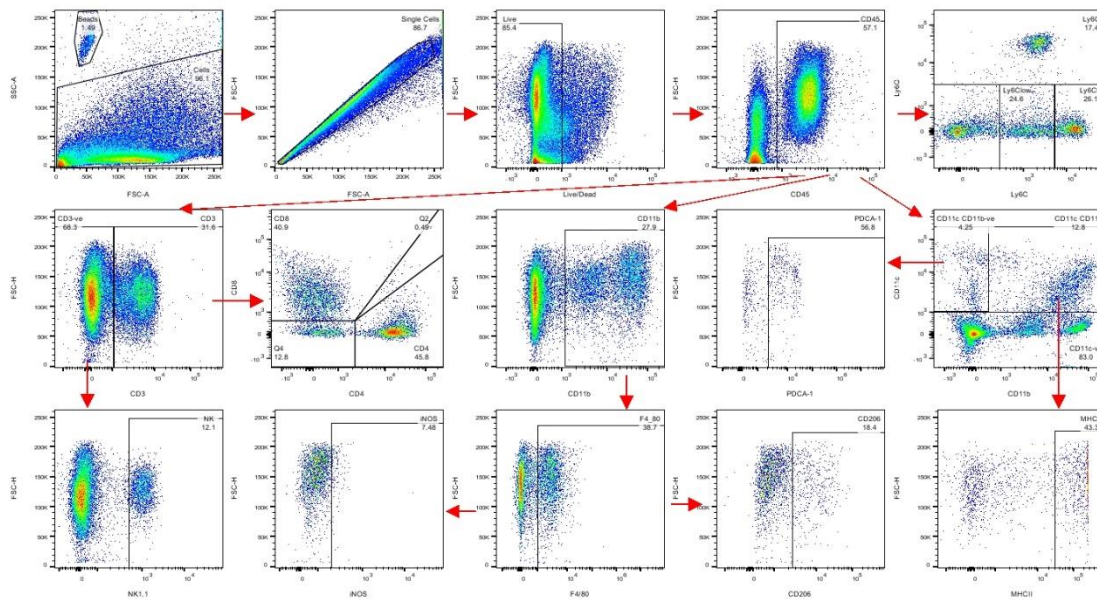

**Supplementary Figure S2. Flow cytometry gating strategy.** Lymphocytes and myeloid cells were gated as CD3<sup>+</sup> or CD11b<sup>+</sup> respectively from CD45<sup>+</sup> leukocytes. CD3<sup>+</sup> T cells were further divided into subsets T helper (CD4<sup>+</sup>) and cytotoxic (CD8<sup>+</sup>) T cells. NK cells (NK1.1<sup>+</sup>) were gated from CD3<sup>+</sup> populations. Patrolling Ly6C<sup>lo</sup>, pro-inflammatory Ly6C<sup>hi</sup> monocytes and inflammatory Ly6G<sup>+</sup> neutrophils were identified within CD11b<sup>+</sup> myeloid cells. F4/80<sup>+</sup> macrophages were identified from CD11b<sup>+</sup> cells then further divided into subsets M1 proinflammatory (iNOS<sup>+</sup>) and M2 anti-inflammatory (CD206<sup>+</sup>). Dendritic cell subsets were gated from CD11b<sup>+</sup>/CD11c<sup>-</sup> populations (plasmacytoid, PDCA-1<sup>+</sup>) or CD11b<sup>+</sup>/CD11c<sup>+</sup> populations (myeloid, MHCII<sup>+</sup>).

**Supplementary Table S1. RSV Fusion gene and RPS18 housekeeping cycle threshold (Ct) values of lung and nasal tissue from PBS control and infected mice from 4, 7 and 42 dpi study timepoints.**

| Study endpoint | Genotype | Infection status | Lung tissue <sup>b</sup> |          |                                   | Nasal tissue <sup>c</sup> |          |                                   |
|----------------|----------|------------------|--------------------------|----------|-----------------------------------|---------------------------|----------|-----------------------------------|
|                |          |                  | Ct RSV                   | Ct RPS18 | $\Delta Ct (x 10^4)$ <sup>a</sup> | Ct RSV                    | Ct RPS18 | $\Delta Ct (x 10^4)$ <sup>a</sup> |
| 4 dpi          | WT       | PBS              | 31.21                    | 21.04    | 10.23                             | 38.47                     | 22.73    | 0.15                              |
|                |          | RSV              | 18.69                    | 20.98    | 55679.65                          | 27.95                     | 24.28    | 831.10                            |
|                | TLR7 KO  | PBS              | 28.88                    | 21.03    | 63.29                             | 37.45                     | 24.45    | 1.56                              |
|                |          | RSV              | 18.7                     | 21.04    | 55866.14                          | 29.83                     | 25.28    | 705.97                            |
| 7 dpi          | WT       | PBS              | 33.73                    | 21.13    | 2.97                              | 38.78                     | 26.64    | 3.12                              |
|                |          | RSV              | 24.31                    | 21.23    | 1454.06                           | 31.42                     | 23.31    | 41.53                             |
|                | TLR7 KO  | PBS              | 35.04                    | 21.27    | 1.28                              | 36.46                     | 25.06    | 4.21                              |
|                |          | RSV              | 24.35                    | 20.97    | 1309.66                           | 29.99                     | 23.36    | 77.94                             |
| 42 dpi         | WT       | PBS              | 36.5                     | 21.46    | 0.35                              | 37.16                     | 22.26    | 0.48                              |
|                |          | RSV              | 33.62                    | 20.92    | 2.22                              | 35.77                     | 23.47    | 5.35                              |
|                | TLR7 KO  | PBS              | 36.36                    | 21.51    | 0.41                              | 38.88                     | 22.63    | 0.25                              |
|                |          | RSV              | 33.22                    | 21.67    | 3.97                              | 37.34                     | 24.43    | 4.18                              |

<sup>a</sup> Cycle threshold values for RSV Fusion gene amplification relative to RPS18 housekeeping

<sup>b</sup>  $n = 6-8$  in both PBS controls and RSV infected groups

<sup>c</sup>  $n = 5-8$  in both PBS controls and RSV infected groups
